# Supplementary material for: Baseline Relative Peripheral Refraction Influence on Myopia Control in Children who Wear Individualized Ocular Refraction Customization Lenses
Source: Research Square preprint supplement (doi:10.21203/rs.3.rs-6995922/v1), 2025-08-01
Supplement: Supplementary file 1 [file 97b0378835ef2cbe03b56597.xlsx]

## Sheet: Sheet1
性别	年龄	基线眼轴	基线等球	12个月眼轴	12个月等球	AL变化量	SE变化量	TRDV	RDV-15	RDV-15-30	RDV-30-45	RDV-45-53	RDV-S	RDV-I	RDV-T	RDV-N	控制应答AL	控制应答SE
女	12	24.9	-1.75	24.92	-1.875	0.02	-0.125	0.28	-0.11	-0.13	0.38	0.72	-0.04	0.09	0.66	0.48	1	1
男	12	25.08	-2	25.13	-2	0.05	0	0.46	0.01	0.1	0.5	0.97	-0.02	0.35	1.17	1.41	1	1
男	8	24.57	-4.25	24.73	-4.75	0.16	-0.5	0.72	0.07	0.38	0.95	0.95	0.79	0.93	0.43	0.72	1	0
女	8	24.56	-3.5	24.86	-3.75	0.3	0	0.18	-0.05	-0.05	0.27	0.35	-0.33	0.84	-0.19	0.39	0	1
男	7	24.08	-0.5	24.43	-1.25	0.35	-0.75	0.89	0.02	0.37	1	1.62	-0.71	1.72	1.38	-0.07	0	0
女	7	23.81	-0.5	24.15	-1.25	0.34	-0.75	0.75	-0.03	0.34	0.91	1.24	-0.55	1.28	1.09	-0.21	0	0
男	10	24.43	-2.875	24.68	-3.375	0.25	-0.5	0.75	0.02	0.2	0.86	1.45	-0.06	1.25	1.27	0.51	0	0
女	10	24.56	-3	24.66	-3	0.1	0	0.78	0.05	0.18	0.83	1.68	0.56	0.44	0.93	1.17	1	1
男	14	23.23	-1.125	23.49	-1.75	0.26	-0.625	-0.27	-0.12	-0.44	-0.38	0.09	-1.29	0.29	-0.24	0.23	0	0
女	14	23.46	-1.5	23.67	-2	0.21	-0.5	0.16	0.04	-0.01	0.08	0.56	-0.87	0.6	0.4	0.58	0	0
男	12	25.16	-4.25	25.16	-4.25	0	0	0.26	0	0.12	0.29	0.47	-0.08	0.21	0.79	0.12	1	1
男	12	25.19	-4.125	25.19	-4.125	0	0	0.58	0.02	0.33	0.64	0.96	0.21	0.34	1.25	0.5	1	1
男	13	26.4	-4.375	26.62	-4.75	0.22	-0.375	0.22	-0.03	0.06	0.24	0.45	-0.64	0.74	0.74	0.04	0	0
女	13	25.78	-3	25.97	-3.125	0.19	-0.125	0.39	-0.02	0.2	0.44	0.69	-0.22	0.32	0.28	1.18	1	1
女	11	26.05	-0.5	26.12	-0.875	0.07	-0.375	0.58	-0.01	-0.01	0.64	1.36	0.66	0.49	0.89	0.37	1	0
男	11	26	-1	26.2	-1.625	0.2	-0.625	0.55	0.01	0.04	0.58	1.3	0.19	0.54	1.05	0.51	1	0
女	12	24.95	-2.625	25.07	-3.125	0.12	-0.5	0.95	-0.13	0.11	1.3	1.69	1.73	0.18	1.05	0.91	1	0
女	12	25.23	-3	25.47	-3.5	0.24	-0.5	0.83	-0.04	0.19	0.92	1.74	1.62	0.06	1.42	0.33	0	0
女	12	25.49	-6	25.98	-7	0.49	-1	0.65	-0.12	0.29	0.68	0.62	-0.11	1.2	0.89	0.54	0	0
女	12	25.05	-5	25.41	-6	0.36	-1	0.33	-0.03	0.27	0.54	0.6	-0.2	0.86	1.06	-0.4	0	0
男	12	26.14	-5.25	26.56	-6.25	0.42	-1	-0.11	-0.14	-0.32	-0.16	0.26	-0.96	0.11	0.83	-0.4	0	0
女	12	26.18	-5.5	26.67	-6.5	0.49	-1	-0.03	-0.06	-0.03	-0.02	-0.01	-0.62	0.26	0.04	0.19	0	0
女	14	26.07	-1.375	26.2	-1.625	0.13	-0.5	-0.11	-0.12	-0.25	-0.24	0.3	-0.78	0.54	-1.08	0.88	1	0
男	14	25.9	-1	26.1	-1.5	0.2	-0.5	-0.1	-0.05	-0.14	-0.14	0	-1	0.26	-0.27	0.59	0	0
男	14	25.66	-5.875	26.22	-6.875	0.56	-1	1.14	-0.07	0.22	1.35	2.26	2.63	-0.31	1.8	0.55	0	0
男	14	24.67	-3.5	25.02	-4	0.35	-0.5	0.86	-0.13	0.06	0.97	1.93	2.37	-0.41	0.17	1.39	0	0
男	9	24.79	-2.75	24.91	-2.75	0.1	0	0.52	-0.07	-0.05	0.34	0.35	-0.04	0.74	0.73	0.65	1	1
女	9	24.56	-2	24.68	-2.25	0.12	-0.25	0.09	-0.04	0.02	0.16	0.26	-0.87	0.7	0.14	0.4	1	1
女	13	24.03	-2.375	24.14	-2.5	0.11	-0.125	0.84	-0.13	-0.11	0.96	2.07	1.18	0.14	0.33	1.82	1	1
男	13	23.77	-2.125	23.83	-2	0.06	0.125	0.79	-0.05	-0.1	0.91	1.91	1.05	0.24	0.55	1.42	1	1
女	11	25.05	-2.875	25.04	-2.875	-0.01	0	0.95	-0.01	0.27	1.1	1.84	1.22	0.73	0.87	0.98	1	1
女	11	25.2	-2.75	25.19	-3	-0.01	-0.25	0.66	-0.03	0.14	0.74	1.4	1.33	0.06	1.05	0.18	1	1
男	15	24.6	-2.25	24.8	-2.375	0.2	-0.125	-0.65	-0.04	-0.15	-0.6	-1.56	-1.64	-0.79	0.36	-0.51	1	1
男	15	24.51	-2.125	24.86	-2.625	0.35	-0.5	-0.2	-0.02	-0.07	-0.08	-0.64	-1.26	0.8	-0.11	-0.2	0	0
男	9	24.4	-2.75	24.76	-3.25	0.36	-0.5	0.33	-0.11	-0.09	0.41	0.84	-0.39	0.49	0.78	0.45	0	0
女	9	24.12	-2.25	24.58	-2.75	0.46	-0.5	0.31	-0.03	0.03	0.35	0.69	-0.71	0.8	0.78	0.36	0	0
男	9	23.77	-2	24.05	-2.375	0.28	-0.375	0.36	-0.01	0.11	0.41	0.69	-0.37	0.76	0.6	0.43	0	0
女	9	23.94	-2.25	24.06	-2.25	0.12	0	0.62	0.03	0.26	0.73	1.08	-0.22	0.86	0.67	1.17	1	1
女	13	25.44	-3.25	25.59	-3.75	0.15	-0.5	0.42	-0.06	0.13	0.5	0.81	-0.54	0.6	1.24	0.38	1	0
女	13	25.37	-3.25	25.58	-3.75	0.21	-0.5	0.04	-0.08	-0.15	0.03	0.31	-0.28	0.27	0.36	-0.21	0	0
男	9	23.72	-1	23.93	-1.75	0.21	-0.75	-0.23	-0.06	-0.23	-0.31	-0.11	-0.8	-0.08	0.17	-0.19	0	0
男	9	23.79	-1.5	24	-2.25	0.21	-0.75	0.01	0.09	-0.06	-0.02	0.1	-0.72	0.27	0.2	0.26	0	0
男	14	23.85	-3	23.92	-3.5	0.07	-0.5	0.07	-0.09	-0.1	0.13	0.22	-0.64	0.24	-0.25	0.94	1	0
女	14	23.78	-2.125	23.99	-2.75	0.21	-0.625	0.1	-0.06	0.01	0.13	0.18	-1.15	0.95	-0.18	0.77	0	0
女	9	23.41	-1	23.86	-2	0.45	-1	0.24	-0.11	-0.3	0.21	1.07	0.52	-0.12	0.41	0.14	0	0
女	9	23.1	-0.5	23.73	-1.75	0.63	-1.25	0.36	-0.03	-0.14	0.37	1.11	-0.39	0.66	1.16	0.01	0	0
男	11	23.86	-0.75	23.96	-0.75	0.1	0	0.67	-0.07	0.05	0.79	1.43	-0.31	1.52	0.28	1.15	1	1
男	11	23.97	-0.75	24.06	-0.75	0.09	0	0.38	-0.04	-0.04	0.46	0.9	-0.47	0.96	0.38	0.65	1	1
男	11	24.99	-3.25	25.05	-3.5	0.06	-0.25	0.24	-0.04	-0.27	-0.08	0.05	-0.06	0.6	0.4	0.02	1	1
女	11	24.84	-2.875	24.93	-3.125	0.09	-0.25	0.12	0.01	0.24	0.27	0.45	-0.39	0.32	0.74	1.17	1	1
男	12	24.77	-2.25	25.12	-3	0.35	-0.75	0.26	-0.06	0.26	1.19	1.65	0.16	0.05	0.2	0.59	0	0
男	12	24.47	-1.75	24.5	-1.875	0.03	-0.125	0.03	-0.09	-0.07	0.29	0.7	-0.9	0.56	0.25	0.21	1	1
女	7	23.19	-1.875	23.47	-2.375	0.28	-0.5	0.12	0.05	-0.03	0.38	-0.18	-0.41	0.55	-0.47	0.82	0	0
男	7	23.14	-1.625	23.46	-2	0.32	-0.375	-0.27	-0.01	-0.17	-0.23	-0.58	-0.89	0.05	-0.38	0.13	0	0
女	10	24.33	-3.125	24.58	-3.625	0.25	-0.5	0.26	-0.09	0	0.38	0.46	0.1	-0.11	-0.36	0	0	0
男	10	24.24	-3.125	24.59	-3.625	0.35	-0.5	-0.04	-0.04	-0.05	0.23	-0.55	-0.2	-0.23	-0.93	-0.13	0	0
男	8	25.57	-2.75	25.88	-3.625	0.31	-0.875	0.5	-0.07	0.04	0.55	1.17	0.25	0.29	0.46	0.97	0	0
男	8	25.23	-2.25	25.45	-2.75	0.22	-0.5	0.02	0.03	0.05	-0.01	0.06	0.21	-0.69	0.61	-0.04	0	0
女	10	24.79	-0.875	25.01	-1.375	0.22	-0.5	0.44	-0.12	-0.02	0.57	0.92	0.12	0.9	0.91	-0.17	0	0
男	10	24.61	-0.375	24.79	-0.875	0.18	-0.5	0.3	-0.01	0.02	0.35	0.65	0.01	0.5	1	-0.31	1	0
女	14	25.15	-1.875	25.04	-2.125	-0.11	-0.25	0.05	0.05	-0.08	0.03	0.21	-0.62	0.45	0.37	-0.01	1	1
男	14	24.89	-1.75	25.06	-2	0.17	-0.25	-0.17	-0.16	0.16	0.56	1.01	-1.01	0.17	-0.26	0.42	1	1
男	12	23.95	-1.75	24.17	-2.125	0.22	-0.375	0.07	-0.05	-0.04	0.07	0.23	-0.33	0.07	0.11	0.42	0	0
男	12	23.7	-0.75	23.88	-1.125	0.18	-0.375	-0.32	-0.12	-0.25	-0.31	-0.51	-0.47	-0.45	-0.07	-0.28	1	0
女	9	26.23	-6.75	26.63	-7.5	0.4	-0.75	0.68	-0.05	0.18	0.85	1.23	0.5	0.28	0.62	0.12	0	0
女	9	26.04	-6.5	26.3	-7	0.26	-0.5	0.65	-0.09	0.21	0.8	1.18	0.44	0.41	1.33	0.42	0	0
男	13	24.56	-0.875	24.58	-1.25	0.02	-0.375	0.15	-0.08	-0.11	0.16	0.43	-0.23	0.14	0.49	0.17	1	0
女	13	24.15	-0.25	24	-0.5	-0.15	-0.25	-0.83	-0.19	-0.1	0.04	0.05	-1.74	-0.39	-0.72	1.02	1	1
女	10	23.55	-1.5	23.66	-1.625	0.11	-0.125	0.04	-0.01	-0.05	-0.03	0.32	-1.16	0.81	0.51	0	1	1
男	10	23.67	-1.875	23.81	-2.125	0.14	-0.25	0.35	-0.06	-0.1	0.42	0.91	-0.75	0.93	0.55	0.67	1	1
女	14	24.02	-1.875	24.15	-1.875	0.13	0	-0.14	-0.12	-0.23	-0.11	0.12	-0.42	-0.13	0.1	-0.08	1	1
男	14	23.67	-0.875	23.75	-1	0.08	-0.125	-0.3	-0.02	0.4	0.74	0.78	-0.88	0.14	0.07	-0.52	1	1
女	9	26.52	-1.125	26.82	-1.375	0.3	-0.25	0.21	-0.03	-0.16	0.25	0.65	-0.39	0.51	0.24	0.47	0	1
男	9	26.28	-0.75	26.41	-1	0.13	-0.25	0.2	-0.03	-0.01	0.2	0.5	-0.52	0.51	0.43	0.35	1	1
男	14	26.36	-2.75	26.24	-3	-0.12	-0.25	0.44	-0.05	0.01	0.52	0.96	0.8	-0.12	0.32	0.73	1	1
男	14	25.8	-2.625	25.74	-2.5	-0.06	0.125	0.66	-0.04	0.17	0.84	1.14	1.37	-0.17	-0.03	1.47	1	1
男	11	24.36	-2.625	24.54	-3.375	0.18	-0.75	0.16	-0.07	-0.03	0.34	0.13	-0.29	0.48	-0.14	0.57	1	0
女	11	24.34	-2.75	24.55	-3.625	0.21	-0.875	0.22	0	0.1	0.19	0.5	-0.26	0.51	-0.01	0.65	0	0
女	9	22.82	-0.625	22.78	-0.625	-0.04	0	0.52	-0.07	0.3	0.65	0.77	-0.03	0.89	0.56	0.64	1	1
男	9	22.97	-0.75	23.32	-1.5	0.35	-0.75	0.64	-0.06	0.4	0.9	0.68	0.27	1.18	0.76	0.31	0	0
女	13	27.61	-3.375	27.82	-4.125	0.21	-0.75	0.74	-0.04	0.03	0.81	1.73	0.29	0.99	0.88	0.78	0	0
男	13	27.49	-3.125	27.72	-4.125	0.23	-1	0.61	-0.02	0.04	0.64	1.44	0.36	0.8	0.61	0.65	0	0
女	12	23.91	-0.875	23.89	-0.875	-0.02	0	0.12	0.01	0.07	0.25	0.46	-1.03	0.93	0.27	1.43	1	1
男	12	24.21	-1.5	24.17	-1.25	-0.04	0.25	0.4	-0.1	0.02	0.13	0.36	-0.19	0.84	-0.22	1.17	1	1
女	16	24.86	-4.25	25.08	-4.5	0.22	-0.25	0.69	-0.07	0.08	0.79	1.48	0.36	0.61	0.32	1.55	0	1
男	16	24.42	-3.75	24.46	-3.75	0.04	0	1.14	0	0.46	1.34	1.97	1.73	0.28	-0.15	2.78	1	1
女	10	24.33	-1.5	24.47	-2	0.14	-0.5	0.43	0	0.14	0.6	0.62	-0.56	0.88	0.26	1.13	1	0
女	10	24.08	-1	24.19	-1.5	0.11	-0.5	0.87	0.02	0.26	1.07	1.51	0.16	0.87	0.78	1.63	1	0
女	12	24.92	-1	24.65	-0.75	-0.27	0.25	0.37	-0.01	0.11	0.45	0.65	-0.34	0.82	0.17	0.81	1	1
女	12	24.77	-0.875	24.57	-0.625	-0.2	0.25	0.97	-0.01	0.35	1.14	1.73	0.37	1.09	0.21	2.19	1	1
女	16	27.32	-6	27.53	-6.375	0.21	-0.375	0.14	-0.04	-0.02	0.14	0.41	0.04	0.36	0.2	-0.04	0	0
女	16	27.35	-6	27.52	-6.375	0.17	-0.375	0.18	0.01	0.06	0.2	0.36	0.25	0.33	0.14	0	1	0
男	12	25.9	-4.75	26.06	-5.25	0.16	-0.5	0.75	-0.05	0.17	0.93	1.54	0.44	0.54	0.77	1.23	1	0
男	12	24.83	-2	25.05	-2.625	0.22	-0.625	0.3	-0.09	-0.02	0.53	1.14	-0.09	0.34	0.5	0.46	0	0
男	13	24.19	-2.25	24.33	-2.5	0.14	-0.25	0.33	-0.07	-0.03	0.38	0.82	-0.04	0.05	0.72	0.68	1	1
女	13	23.95	-1.875	24.03	-2.25	0.08	-0.375	0.34	0.02	0.05	0.51	0.49	0.54	-0.33	0.43	0.77	1	0
男	9	23.28	-1.625	23.23	-1.375	-0.05	0.25	0.03	-0.03	-0.37	0.03	0.52	-0.21	0.14	-0.53	0.73	1	1
女	9	23.21	-1	23.24	-0.875	0.03	0.125	0.8	0.23	0.31	0.9	1.41	1.3	0.38	-0.1	1.6	1	1
男	8	24.2	-1.625	24.1	-1.5	-0.1	0.125	0.22	-0.09	0.01	0.51	1.06	-0.14	0.14	-0.78	1.67	1	1
男	8	24.14	-1.325	24.13	-1.325	-0.01	0	0.33	0.01	0.22	1.04	1.41	-1.03	0.79	0.88	0.66	1	1
女	9	22.04	-1.375	22.19	-1.875	0.15	-0.5	0.06	0.01	-0.2	0.07	0.36	-0.65	0.33	-0.13	0.7	1	0
女	9	22.19	-1.375	22.62	-2.5	0.43	-1.125	0.22	-0.07	-0.13	0.22	0.73	-0.24	0	0.86	0.23	0	0
男	15	26.84	-4.5	26.97	-4.75	0.13	-0.25	0.56	-0.06	0.02	0.71	1.14	-0.24	1.04	0.13	1.39	1	1
男	15	27.09	-5	27.1	-5	0.01	0	0.3	-0.1	-0.07	0.37	0.75	-0.58	0.78	-0.03	1.11	1	1
男	10	24.85	-1.75	25.32	-2.5	0.47	-0.75	0.28	-0.07	-0.05	0.32	0.71	-0.59	0.65	0.79	0.26	0	0
女	10	25.3	-2.25	25.61	-3.25	0.31	-1	0.22	-0.06	-0.09	0.25	0.62	-0.53	0.49	0.66	0.26	0	0
女	14	24.58	-2.75	24.56	-2.75	-0.02	0	0.36	-0.06	-0.03	0.42	0.88	0.18	0.15	-0.13	1.24	1	1
女	14	23.29	0.5	23.38	0.25	0.09	-0.25	-0.42	-0.1	-0.34	-0.52	-0.43	-0.61	-0.42	-0.21	1.12	1	1
男	11	23.3	-3.25	23.5	-3.625	0.2	-0.375	0.64	-0.09	0.09	0.75	1.37	0.47	0.51	0.83	0.75	1	0
女	11	22.7	-1	22.7	-1	0	0	0.3	-0.05	-0.14	0.38	0.8	0.18	0.31	0.48	1.13	1	1
男	11	25.54	-0.625	25.6	-1	0.06	-0.375	0.22	-0.07	0	0.39	0.24	-0.46	0.7	0.15	1.46	1	0
女	11	25.64	-1	25.86	-1.5	0.22	-0.5	0.27	0.05	0.25	0.37	0.19	-0.45	0.75	0.34	0.44	0	0
女	7	23.35	-1.25	23.74	-2.25	0.39	-1	0.02	-0.04	-0.13	0.41	-0.55	-0.52	-0.18	0.03	0.74	0	0
男	7	23.35	-1.25	23.74	-2.25	0.39	-1	0.36	-0.01	0.09	0.39	0.77	-0.11	0.59	0.38	0.56	0	0
男	11	23.77	-1.375	24.1	-2.125	0.33	-0.75	0.37	0.02	-0.02	0.41	0.88	-0.14	0.92	0.12	0.57	0	0
男	11	24.39	-3.25	24.57	-3.5	0.18	-0.25	0.04	-0.09	-0.19	0	0.42	-0.54	0.27	0.39	0.01	1	1
女	16	24.59	-4.375	24.66	-4.375	0.07	0	0	-0.04	-0.04	0.03	-0.01	-0.68	0.3	0.38	-0.02	1	1
女	16	24.87	-4.75	25.9	4.75	0.03	0	1.66	0.02	0.65	2.06	2.68	0.1	2	1.9	2.6	1	1
男	10	23.88	-1.125	23.79	-0.875	-0.09	0.25	1.16	-0.07	0.27	1.52	1.98	1.77	0.17	0.44	2.23	1	1
女	10	23.64	-0.75	23.59	-0.5	-0.05	0.25	1.23	-0.01	0.5	1.49	2.06	1.3	0.54	0.7	2.36	1	1
男	10	23.9	-1	24.22	-1.375	0.32	-0.375	0.37	-0.05	-0.07	0.4	0.96	0.06	0.35	0.19	0.83	0	0
男	10	23.85	-0.875	24.11	-1.25	0.26	-0.375	0.87	0.04	0.25	1.03	1.6	0.4	0.95	1.27	0.85	0	0
男	11	24.14	-2.375	24.41	-3.125	0.27	-0.75	2.15	0.18	1.29	2.64	2.93	2.19	1.99	2.18	0.17	0	0
女	11	23.7	-1	24.09	-2	0.39	-1	1.33	0.03	0.82	1.7	1.72	1.05	1.49	1.41	0.41	0	0
女	12	24.1	-4.325	24.16	-4.5	0.06	-0.175	0.48	-0.05	0.01	0.55	1.09	0.15	0.55	0.48	0.81	1	1
女	12	24.13	-4.325	24.21	-4.5	0.08	-0.175	0.24	-0.17	-0.17	0.29	0.78	0.11	-0.01	-0.85	1.8	1	1
女	12	25.55	-1.5	25.87	-2.25	0.32	-0.75	0.47	-0.08	-0.15	0.58	1.16	0.28	0.72	0.25	0.69	0	0
男	12	25.71	-2.25	26.12	-3	0.41	-0.75	0.9	0.02	0.33	1.15	1.4	0.31	1.46	0.81	1.06	0	0
男	14	26.63	-4.75	26.87	-5.25	0.24	-0.5	0.26	-0.08	0.08	0.26	0.63	0.05	0.17	0.08	0.73	0	0
女	14	26.63	-5	26.71	-5.25	0.08	-0.25	0.15	-0.07	-0.03	0.27	0.2	0.09	0.2	-0.33	0.61	1	1
男	12	25.4	-2.75	25.72	-3.75	0.32	-1	0	-0.01	-0.04	0.84	1.42	-1.09	0.55	0.25	0.29	0	0
女	12	25.27	-3	25.6	-4.125	0.33	-1.125	0	0.03	0.21	0.52	0.12	-0.29	0.09	0.59	-0.37	0	0
男	16	24.93	-5.5	25.09	-5.625	0.16	-0.125	0.19	-0.04	0.08	0.21	0.35	-0.56	-0.08	-0.29	1.69	1	1
男	16	24.59	-4.875	24.65	-4.75	0.06	0.125	0.24	-0.1	0.01	0.38	0.37	-0.38	0.41	-0.12	1.04	1	1
男	12	22.84	-3.875	22.94	-4.25	0.1	-0.375	0.31	-0.07	0	0.43	0.58	1.38	-0.64	0.01	0.47	1	0
男	12	22.83	-3.875	22.98	-4.625	0.15	-0.75	0.43	0.04	0.15	0.53	0.74	0.27	0.41	1.24	-0.2	1	0
女	8	23.37	-1	23.5	-1.25	0.13	-0.25	0.57	-0.05	0.04	0.76	1.07	-0.38	0.79	1	0.86	1	1
男	8	23.58	-1.875	23.65	-2.125	0.07	-0.25	0.69	0.09	0.41	0.7	1.23	-0.4	0.96	0.78	1.4	1	1
女	9	22.61	-0.875	22.84	-1.125	0.23	-0.25	-0.08	-0.1	-0.13	0.18	0.44	-1.47	0.77	0.09	0.3	0	1
男	9	22.92	-1.625	23.13	-2.125	0.21	-0.5	-0.1	-0.1	-0.15	0.07	0.29	-1.18	0.57	-0.59	0.79	0	0
男	9	22.62	-0.25	22.49	-0.25	-0.13	0	0.21	-0.26	-0.3	0.45	0.51	-0.35	0.37	-0.03	0.84	1	1
女	9	22.54	-0.625	22.51	-0.625	-0.03	0	0.55	-0.04	0.11	0.74	0.95	-0.07	0.83	1.02	0.42	1	1
男	15	24.28	-3.375	24.31	-3.5	0.03	-0.125	0.98	0.03	0.66	1.29	1.1	1.9	-0.13	0.95	1.17	1	1
女	15	24.43	-3.875	24.43	-3.875	0	0	-0.01	-0.03	-0.08	0.03	0	-0.54	0.11	0.17	0.21	1	1
女	11	23.08	-1.25	23.23	-1.5	0.15	-0.25	0.29	-0.12	-0.33	0.3	1.14	-0.34	0.36	0.64	0.46	1	1
女	11	23	-0.875	23.12	-1.125	0.12	-0.25	0.99	0.02	0.39	1.18	1.72	0	1.43	1.07	1.46	1	1
男	10	22.86	-0.25	22.93	-0.375	0.07	-0.125	0.27	0.02	0.03	0.37	0.48	-0.19	0.55	0.02	0.7	1	1
男	10	23.52	-2	23.54	-1.875	0.02	0.125	0.65	0.14	0.29	0.74	1.1	-0.59	1.48	1.55	0.14	1	1
女	10	24.22	-1.5	24.4	-1.5	0.18	0	0.27	-0.06	-0.06	0.31	0.7	-0.41	0.59	-0.11	1.01	1	1
女	10	24.1	-1.625	24.2	-1.625	0.1	0	0.25	0	-0.04	0.23	0.72	-0.29	0.58	0.6	0.09	1	1
男	12	27.54	-6.625	27.7	-6.875	0.16	-0.25	-0.04	-0.08	-0.07	-0.02	-0.03	-0.7	0.15	0.5	-0.1	1	1
女	12	27.3	-6.5	27.43	-6.75	0.13	-0.25	-0.06	-0.04	0.02	0.02	-0.29	-0.62	0.25	-0.44	0.58	1	1
女	15	25.87	-6.625	26	-6.875	0.13	-0.25	0.56	-0.02	0.2	0.71	0.92	0.19	0.94	1.07	0.02	1	1
女	15	25.64	-5.875	25.52	-5.75	-0.12	0.125	0.19	0.01	0	0.22	0.41	0.79	-0.26	0.29	1.16	1	1
男	7	25.23	-1.25	25.51	-1.875	0.28	-0.625	-0.07	-0.07	-0.19	-0.02	-0.02	-0.68	0.38	-0.32	0.34	0	0
女	7	25.41	-1.75	25.62	-2.25	0.21	-0.5	-0.06	-0.12	-0.16	0.01	-0.04	-0.48	0.06	-0.08	0.28	0	0
女	11	24.08	-0.5	24.18	-0.75	0.1	-0.25	-0.02	-0.04	-0.19	-0.02	0.17	-0.5	0.08	0.05	0.28	1	1
男	11	24.31	-0.75	24.43	-0.875	0.12	-0.125	0.16	0	0.07	0.19	0.28	-0.34	0.22	0.06	0.7	1	1
男	11	24.92	-2.625	25.13	-3.75	0.21	-1.125	1.24	0.12	0.4	1.38	2.39	0.61	1.24	1.79	1.3	0	0
男	11	24.97	-2.625	25.03	-3	0.06	-0.375	0.76	-0.03	0.16	0.74	1.82	0.23	0.7	1.07	1.02	1	0
女	12	25.39	-1.5	25.49	-1.25	0.1	0.25	0.52	-0.02	0.14	0.62	0.98	-0.27	1.36	0.53	0.44	1	1
女	12	25.49	-1.75	25.46	-1.5	-0.03	0.25	1.07	0.01	0.35	1.24	1.98	-0.06	1.89	0.95	1.48	1	1
女	8	23.26	-1.75	23.83	-2.25	0.57	-0.5	0.4	-0.01	0.33	0.46	0.54	-0.07	0.64	1.24	-0.2	0	0
男	8	23.51	-1.75	23.85	-2.25	0.34	-0.5	0.88	0.04	0.32	1.11	1.4	0.39	0.88	1.09	-0.41	0	0
女	13	24.04	-1	24.22	-1.25	0.18	-0.25	0.68	0.01	0.17	0.82	1.26	0.48	0.02	0.45	1.75	1	1
女	13	23.96	-1.25	24.22	-1.625	0.26	-0.375	0.15	0.07	0.21	0.16	0.09	-0.97	0.87	0.72	-0.02	0	0
女	7	22.78	-1	22.92	-1	0.14	0	0.43	-0.08	-0.17	0.6	0.99	-0.39	0.88	0.31	0.93	1	1
女	7	22.52	-0.5	22.7	-0.75	0.18	-0.25	0.3	0.01	0.14	0.36	0.49	-0.8	0.92	0.26	0.83	1	1
女	10	23.42	-2	23.58	-2.625	0.16	-0.625	0.67	-0.08	0.22	0.81	1.19	0.1	0.67	0.11	1.86	1	0
男	10	23.38	-2.5	23.52	-2.875	0.14	-0.375	0.59	0.01	0.18	0.65	1.17	-0.66	0.68	1.09	1.32	1	0
男	14	24.22	-4.625	24.3	-4.5	0.08	0.125	0.59	0	0.12	0.7	1.16	0.4	0.26	0.5	1.28	1	1
女	14	24.39	-5	24.54	-5.375	0.15	-0.375	0.42	-0.06	-0.1	0.44	1.15	0.76	-0.48	0.39	1.09	1	0
男	13	23.84	-2.625	23.93	-2.625	0.09	0	0.66	-0.1	-0.02	0.71	1.63	1.25	-0.09	0.27	1.21	1	1
女	13	23.7	-2	23.79	-2.375	0.09	-0.375	0.53	-0.05	0.04	0.57	1.24	1.19	-0.48	-0.07	1.48	1	0
男	16	26.58	-5.125	26.73	-5.625	0.15	-0.5	0.44	-0.02	0.13	0.55	0.75	-0.07	0.53	1.19	0.16	1	0
男	16	24.73	-1.5	24.92	-2	0.19	-0.5	0.39	0.03	0.05	0.5	0.71	0.04	0.18	1.4	-0.02	1	0
男	9	24.97	-2.125	25.04	-2.125	0.07	0	-0.14	-0.03	-0.18	-0.11	-0.2	-1.36	0.37	-0.04	0.46	1	1
男	9	25.19	-2.5	25.13	-2.5	-0.06	0	0	-0.06	-0.23	0.04	0.19	-0.78	0.12	0.51	0.96	1	1
女	11	24.05	-3.5	24.08	-3.75	0.03	-0.25	0.78	-0.06	0.07	0.52	0.65	1.21	0.28	0.36	1.26	1	1
男	11	24.1	-3.25	24.21	-3.75	0.11	-0.5	0.47	-0.12	0.3	1.04	1.57	0.19	0.37	0.19	1.1	1	0
女	9	23.53	-0.5	23.54	-0.75	0.01	-0.25	0.49	0.04	0.17	1.07	1.87	-0.71	1.05	0.6	1.01	1	1
男	9	23.52	-0.5	23.53	-0.625	0.01	-0.125	0.33	-0.03	0.37	1.05	1.43	-0.74	0.69	0	1.36	1	1
男	11	23.67	-2.5	24.12	-3.5	0.45	-1	0.44	-0.12	-0.27	0	0.37	0.84	0.16	-0.24	-0.44	0	0
女	11	23.98	-3.125	24.43	-4.125	0.45	-1	0.74	-0.05	0.15	0.46	0.58	0.62	0.6	0.5	0.34	0	0
男	14	24.99	-0.375	25.13	-0.5	0.14	-0.125	0.34	0.04	0.01	0.45	0.63	-0.76	1.2	0.33	0.65	1	1
女	14	25.45	-1	25.5	-1	0.05	0	0.19	-0.02	-0.11	0.26	0.48	-0.87	1.07	0.46	1.3	1	1
女	11	24.02	-1.75	24.18	-2.25	0.16	-0.5	0.35	-0.08	-0.11	0.33	1.1	-0.29	0.28	0.78	0.63	1	0
女	11	24.24	-1.625	24.4	-2.125	0.16	-0.5	0.74	-0.05	0.03	0.76	1.82	0.18	0.84	1.25	0.65	1	0
男	10	24.4	-1.75	24.53	-1.625	0.13	0.125	0.25	-0.08	-0.16	0.25	0.86	-0.04	0.49	-0.07	0.61	1	1
女	10	24.38	-1.25	24.4	-1.375	0.02	-0.125	0.58	0.05	0.1	0.51	1.5	0.09	0.71	0.59	0.92	1	1
女	11	24.51	-1.75	24.69	-2.25	0.18	-0.5	0.12	-0.02	0.14	0.57	1.01	-0.39	0.44	0.6	-0.18	1	0
女	11	24.57	-2.125	24.87	-2.75	0.3	-0.625	0.34	0.01	-0.08	0.07	0.35	-0.08	0.52	0.33	0.59	0	0
男	9	23.67	-0.875	23.62	-0.875	-0.05	0	0.55	-0.05	0.19	0.75	0.81	1.68	-0.21	-0.09	0.81	1	1
女	9	23.75	-0.75	23.54	-0.75	-0.21	0	-0.08	-0.09	-0.19	-0.11	0.09	0.12	0.11	-0.42	1.16	1	1
女	12	25.16	-4.5	25.61	-5	0.45	-0.5	0.08	-0.06	-0.1	0.03	0.44	-0.26	0.12	-0.2	0.65	0	0
女	12	24.61	-3.5	24.93	-4.125	0.32	-0.625	0.27	-0.04	0.02	0.3	0.64	-0.17	0.27	-0.46	0.29	0	0
男	10	24.42	-3	24.36	-3	-0.06	0	0.04	-0.02	-0.09	0.08	0.13	-0.32	0.13	0.38	-0.04	1	1
女	10	24.17	-2.25	24.03	-2.25	-0.14	0	0.03	-0.08	-0.11	0.06	0.16	-0.33	0.07	0.03	1.22	1	1
女	12	25.31	-4.5	25.42	-4.75	0.11	-0.25	0.2	-0.06	-0.1	0.33	0.79	-0.66	0.58	0.68	0.18	1	1
男	12	26.35	-4	26.49	-4.25	0.14	-0.25	0.12	-0.01	0.1	0.48	0.76	-0.92	0.74	0.58	0.09	1	1
男	9	24.27	-1.5	24.41	-1.75	0.14	-0.25	0.32	-0.02	-0.05	0.27	0.97	0.4	0.17	-0.24	0.93	1	1
男	9	24.03	-1.25	24.13	-1.5	0.1	-0.25	-0.01	-0.12	-0.18	-0.03	0.24	-0.62	0.48	-0.1	0.19	1	1
女	9	24.42	-1.25	24.79	-2	0.37	-0.75	-0.46	-0.06	-0.05	-0.26	-1.49	-1.14	-0.1	-0.2	-0.38	0	0
女	9	24.12	-1.25	24.43	-1.75	0.31	-0.5	0.04	-0.06	0.62	1.23	1.63	-0.61	0.46	-0.25	0.54	0	0
女	11	25.22	-2.5	25.56	-3	0.34	-0.5	0.43	-0.06	0.08	1.07	1.57	0	0.48	0.24	0.13	0	0
女	11	24.41	-0.5	24.7	-1	0.29	-0.5	0.28	-0.06	0.12	1.17	1.72	-0.4	0.88	-0.64	1.28	0	0
女	12	24.66	-3.75	24.92	-4	0.26	-0.25	0.32	-0.09	-0.04	0.27	1	-0.37	0.76	0.15	0.72	0	1
男	12	25.07	-5.25	25.35	-5.5	0.28	-0.25	0.49	-0.06	0.16	0.63	0.8	-0.34	0.82	0.32	0.21	0	1
男	11	25.07	-3.625	25.14	-3.75	0.07	-0.125	-0.19	-0.08	-0.16	-0.19	-0.27	-0.63	-0.17	0.05	1.46	1	1
男	11	25.17	-4.125	25.38	-4.5	0.21	-0.375	0.14	-0.03	0.01	0.17	0.3	-0.31	0.14	0.22	0.51	0	0
女	13	23.68	-0.875	23.6	-0.875	-0.08	0	0.32	-0.15	-0.36	0.3	1.28	-0.65	0.75	-0.14	1.3	1	1
男	13	23.81	-0.75	23.69	-0.875	-0.12	-0.125	0.86	-0.03	0.17	0.98	1.77	0.77	0.65	0.64	1.37	1	1
男	10	24.51	-1.625	24.67	-1.875	0.16	-0.25	0.54	-0.03	0.14	0.7	0.9	-0.51	1.11	0.33	1.22	1	1
男	10	24.62	-2.25	24.74	-2.375	0.12	-0.125	1.13	-0.02	0.6	1.38	1.69	0.38	1.48	1.14	1.48	1	1
女	12	24.41	-2.25	24.76	-3	0.35	-0.75	0.1	-0.13	-0.12	0.2	0.23	0.17	-0.1	0.46	-0.12	0	0
男	12	24.16	-2	24.69	-2.75	0.53	-0.75	0.48	-0.1	0.05	0.61	0.93	0.03	0.89	0.53	0.51	0	0
男	10	23.51	-1.25	24.14	-2.25	0.63	-1	0.33	-0.06	-0.06	0.64	1.17	-0.32	0.47	0.82	0.35	0	0
女	10	23.31	-0.5	23.64	-1.25	0.33	-0.75	0.14	-0.02	-0.21	0.3	0.67	-0.45	0.53	0.3	0.17	0	0
男	9	23.53	-2.25	23.47	-2.25	-0.06	0	0.46	0.01	1.22	2.27	-0.16	-0.63	1.37	0.85	0.24	1	1
女	9	23.83	-3	23.97	-3.25	0.14	-0.25	0.64	0.01	0.25	-1.02	-0.82	-0.08	1.13	0.88	0.61	1	1
女	11	25.94	-4.25	26.01	-4.25	0.07	0	0.37	-0.08	0.17	0.42	0.37	0.47	-0.1	0.05	1.06	1	1
男	11	25.97	-4.125	26.08	-4.375	0.11	-0.25	0.49	0	-0.18	-0.67	-1.01	0.23	0.5	-0.16	1.37	1	1
男	11	24.8	-1	25	-1.25	0.2	-0.25	0.98	0	0.23	1.23	1.72	0.03	1.33	0.84	1.68	1	1
女	11	24.73	-1	24.82	-1.25	0.09	-0.25	0.68	0	0.29	0.76	1.25	0.12	0.67	0.78	1.14	1	1
男	12	25.67	-2	25.99	-2.5	0.32	-0.5	0.64	0.01	0.27	0.82	0.98	0.25	0.84	0.53	0.94	0	0
男	12	25.57	-1.75	25.86	-2.375	0.29	-0.625	0.28	0.02	0.15	0.33	0.42	-0.85	1.08	0.56	0.3	0	0
女	13	23.9	-2	24.19	-2.625	0.29	-0.625	0.47	-0.09	-0.02	0.53	1.14	0.45	-0.06	0.54	0.92	0	0
女	13	23.95	-2	24.1	-2.5	0.15	-0.5	0.61	-0.05	0.08	0.74	1.22	0.62	-0.01	0.5	1.3	1	0
女	11	23.15	-1.375	23.17	-2	0.02	-0.625	0.52	0.02	0.11	0.74	1.49	-0.9	1.55	1.24	2.29	1	0
女	11	23.44	-2.5	23.63	-3	0.19	-0.5	0.56	0.06	0.14	0.6	0.95	-0.21	0.98	1.22	0.25	1	0
女	14	24.44	-0.375	24.49	-0.375	0.05	0	0.61	-0.04	0.03	0.62	1.47	0.01	0.51	0.49	1.4	1	1
男	14	24.55	-0.25	24.61	-0.375	0.06	-0.125	0.44	-0.05	-0.11	0.5	1.13	-0.2	0.54	0.51	0.9	1	1
男	8	25.13	-2.5	25.47	-3.125	0.34	-0.625	0.72	0.02	0.21	0.83	1.38	-0.19	1.12	0.81	1.23	0	0
女	8	25.13	-2.5	25.56	-3.125	0.43	-0.625	0.56	-0.06	0.08	0.67	1.14	-0.36	0.95	0.83	0.86	0	0
